# Supplementary material
Source: PubMed Central journal article supplement (PMC5745675)
Supplement: PEDS_20171026LSupplementaryData.pdf [file PEDS_20171026LSupplementaryData.pdf]

## Supplemental Information

**SUPPLEMENTAL TABLE 6** Phthalates Sources and Metabolites

| Product                             | Phthalate | Metabolite |
|-------------------------------------|-----------|------------|
| Toys, medical supplies              | DEHP      | MEHP       |
|                                     |           | MEOHP      |
|                                     |           | MEHHP      |
|                                     |           | MECPP      |
| Toys                                | DINP      | MINP       |
|                                     |           | MCIOP      |
|                                     |           | MOINP      |
|                                     |           | MHINP      |
|                                     |           | MIDP       |
|                                     |           | MnOP       |
| PVC, vinyl floors, cosmetics        | BBzP      | MBzP       |
|                                     | DEHP      | MEHP       |
|                                     |           | MEOHP      |
|                                     |           | MEHHP      |
|                                     |           | MECPP      |
| Cosmetics: nail polish and perfumes | DEP       | MEP        |
|                                     | DBP       | MBP        |
|                                     | DMP       |            |

BBzP, benzyl butyl phthalate; DBP, dibutyl phthalate; DEHP, di-(2-ethylhexyl) phthalate; DEP, diethyl phthalate; DINP, di-isononyl phthalate; DMP, dimethyl phthalate; DNOP, di-n-octyl phthalate; MBP, monobutyl phthalate; MBzP, mono-benzyl phthalate; MCIOP, mono-(carboxy-isoctyl) phthalate; MECPP, mono-(2-ethyl-5-carboxypentyl) phthalate; MEHHP, mono-(2-ethyl-5-hydroxyhexyl) phthalate; MEHP, mono-(2-ethylhexyl) phthalate; MEOHP, mono-(2-ethyl-5-oxohexyl) phthalate; MEP, mono-ethyl phthalate; MHINP, mono-(hydroxy-isononyl) phthalate; MIDP, mono-isodecyl phthalate; MINP, mono-isononyl phthalate; MnOP, mono-n-octyl phthalate; MOINP, mono-(oxoisononyl) phthalate; PVC, polyvinyl chloride.
